# Supplementary material for: Motor expertise modulates unconscious rather than conscious executive control
Source: PeerJ. 2019 Feb 5;7:e6387. doi: 10.7717/peerj.6387 (PMC6368002; doi:10.7717/peerj.6387)
Supplement: Supplemental Information 1 [file peerj-07-6387-s001.xlsx]

## Sheet: conscious RT-ER
Subject	Group 1=novices, 2=table tennis athletes	Congruent(RT:ms)	Incongruent(RT:ms)	Congruent(ER：%)	Incongruent(ER：%)	conscious response priming
101	1	342.8	350.59	0	1	7.79
102	1	434.67	441.47	0	0	6.8
103	1	394.79	419.35	0	3	24.56
104	1	346.92	397.7	22	37	50.78
105	1	348	343.69	1	6	-4.31
106	1	383.62	400.53	0	3	16.91
107	1	369	358.83	3	4	-10.17
108	1	451.78	461.33	0	0	9.55
109	1	455.15	450.26	1	6	-4.89
110	1	448.32	432.62	0	1	-15.7
111	1	362.75	367.73	3	6	4.98
112	1	459.13	457.87	1	9	-1.26
113	1	445.24	447.84	1	7	2.6
114	1	422.37	444.97	3	11	22.6
115	1	429.37	428.63	1	3	-0.74
116	1	352.91	349.51	0	5	-3.4
117	1	369.64	380.19	3	19	10.55
118	1	385.33	387.63	0	4	2.3
119	1	355.15	360.69	1	15	5.54
120	1	376.07	397.74	0	9	21.67
121	1	410.57	441.29	3	24	30.72
122	1	424.9	406.54	4	11	-18.36
201	2	284.41	329.59	14	32	45.18
202	2	363.38	381.21	0	10	17.83
203	2	350.89	396.18	1	12	45.29
204	2	350.36	310.3	1	5	-40.06
205	2	400.19	443	0	14	42.81
206	2	379.64	406.58	1	15	26.94
207	2	358.25	396.64	0	0	38.39
208	2	326.19	347.77	1	16	21.58
209	2	392.27	371.46	1	4	-20.81
210	2	400.22	428.81	1	11	28.59
211	2	421.95	441	3	1	19.05
212	2	333.63	335.48	1	11	1.85
213	2	382.75	367.3	1	1	-15.45
214	2	378.27	351.69	0	6	-26.58
215	2	352.82	358.7	0	3	5.88
216	2	384.76	384.56	1	15	-0.2
217	2	400.15	435.66	1	7	35.51
218	2	432	429.51	0	10	-2.49
219	2	375.96	359.79	1	0	-16.17
220	2	383.41	377.99	1	1	-5.42

## Sheet: 101
Subject	Condition 1=congruent, 2=incongruent	Reaction time（ms）	1=correct, 0=wrong
101	1	338	1
101	1	347	1
101	1	351	1
101	1	357	1
101	1	357	1
101	1	363	1
101	1	369	1
101	1	372	1
101	1	373	1
101	1	373	1
101	1	376	1
101	1	377	1
101	1	377	1
101	1	378	1
101	1	378	1
101	1	378	1
101	1	379	1
101	1	380	1
101	1	380	1
101	1	382	1
101	1	384	1
101	1	386	1
101	1	386	1
101	1	390	1
101	1	391	1
101	1	391	1
101	1	392	1
101	1	392	1
101	1	393	1
101	1	393	1
101	1	395	1
101	1	395	1
101	1	396	1
101	1	396	1
101	1	396	1
101	1	397	1
101	1	397	1
101	1	399	1
101	1	401	1
101	1	403	1
101	1	403	1
101	1	404	1
101	1	404	1
101	1	408	1
101	1	408	1
101	1	410	1
101	1	412	1
101	1	414	1
101	1	414	1
101	1	416	1
101	1	417	1
101	1	417	1
101	1	417	1
101	1	419	1
101	1	420	1
101	1	422	1
101	1	424	1
101	1	425	1
101	1	426	1
101	1	428	1
101	1	433	1
101	1	435	1
101	1	435	1
101	1	438	1
101	1	438	1
101	1	440	1
101	1	446	1
101	1	448	1
101	1	449	1
101	1	450	1
101	1	451	1
101	1	452	1
101	1	457	1
101	1	459	1
101	1	461	1
101	1	461	1
101	1	480	1
101	1	482	1
101	1	485	1
101	1	493	1
101	2	362	1
101	2	363	1
101	2	366	1
101	2	367	1
101	2	367	1
101	2	367	1
101	2	368	1
101	2	371	1
101	2	372	1
101	2	375	1
101	2	375	1
101	2	375	1
101	2	377	1
101	2	377	1
101	2	377	1
101	2	378	1
101	2	378	1
101	2	379	1
101	2	383	1
101	2	384	1
101	2	384	1
101	2	385	1
101	2	386	1
101	2	387	1
101	2	388	1
101	2	389	1
101	2	392	1
101	2	394	1
101	2	394	1
101	2	396	1
101	2	396	1
101	2	396	1
101	2	398	1
101	2	399	1
101	2	400	1
101	2	401	1
101	2	402	1
101	2	404	1
101	2	405	1
101	2	405	1
101	2	406	1
101	2	406	1
101	2	407	1
101	2	409	1
101	2	409	1
101	2	410	1
101	2	410	1
101	2	411	1
101	2	411	1
101	2	412	1
101	2	413	1
101	2	413	1
101	2	414	1
101	2	414	1
101	2	415	1
101	2	417	1
101	2	417	1
101	2	418	1
101	2	419	1
101	2	419	1
101	2	419	1
101	2	420	1
101	2	420	1
101	2	422	1
101	2	422	1
101	2	423	1
101	2	423	1
101	2	423	1
101	2	427	1
101	2	428	1
101	2	429	1
101	2	432	1
101	2	434	1
101	2	445	1
101	2	446	1
101	2	451	1
101	2	460	1
101	2	470	1
101	2	471	1
101	2	474	1

## Sheet: 102
Subject	Condition 1=congruent, 2=incongruent	Reaction time（ms）	1=correct, 0=wrong
102	1	426	1
102	1	344	1
102	1	330	1
102	1	370	1
102	1	362	1
102	1	382	1
102	1	383	1
102	1	257	1
102	1	444	1
102	1	507	1
102	1	463	1
102	1	449	1
102	1	463	1
102	1	533	1
102	1	449	1
102	1	437	1
102	1	484	1
102	1	447	1
102	1	446	1
102	1	450	1
102	1	412	1
102	1	418	1
102	1	437	1
102	1	419	1
102	1	483	1
102	1	407	1
102	1	755	1
102	1	464	1
102	1	481	1
102	1	458	1
102	1	512	1
102	1	462	1
102	1	407	1
102	1	364	1
102	1	369	1
102	1	495	1
102	1	455	1
102	1	439	1
102	1	443	1
102	1	407	1
102	1	451	1
102	1	409	1
102	1	360	1
102	1	454	1
102	1	386	1
102	1	434	1
102	1	448	1
102	1	427	1
102	1	415	1
102	1	364	1
102	1	605	1
102	1	460	1
102	1	403	1
102	1	382	1
102	1	441	1
102	1	421	1
102	1	515	1
102	1	417	1
102	1	527	1
102	1	506	1
102	1	521	1
102	1	426	1
102	1	344	1
102	1	422	1
102	1	420	1
102	1	389	1
102	1	373	1
102	1	440	1
102	1	388	1
102	1	449	1
102	1	389	1
102	1	438	1
102	1	482	1
102	1	517	1
102	1	602	1
102	1	677	1
102	1	540	1
102	1	426	1
102	1	417	1
102	1	498	1
102	2	510	1
102	2	379	1
102	2	472	1
102	2	655	1
102	2	434	1
102	2	586	1
102	2	464	1
102	2	401	1
102	2	376	1
102	2	454	1
102	2	444	1
102	2	483	1
102	2	514	1
102	2	563	1
102	2	448	1
102	2	465	1
102	2	450	1
102	2	525	1
102	2	407	1
102	2	483	1
102	2	452	1
102	2	397	1
102	2	493	1
102	2	441	1
102	2	472	1
102	2	517	1
102	2	381	1
102	2	421	1
102	2	470	1
102	2	418	1
102	2	429	1
102	2	455	1
102	2	462	1
102	2	395	1
102	2	433	1
102	2	452	1
102	2	411	1
102	2	511	1
102	2	421	1
102	2	529	1
102	2	469	1
102	2	384	1
102	2	438	1
102	2	389	1
102	2	1244	1
102	2	416	1
102	2	432	1
102	2	443	1
102	2	367	1
102	2	390	1
102	2	481	1
102	2	429	1
102	2	525	1
102	2	398	1
102	2	365	1
102	2	484	1
102	2	385	1
102	2	456	1
102	2	404	1
102	2	435	1
102	2	449	1
102	2	380	1
102	2	388	1
102	2	431	1
102	2	401	1
102	2	383	1
102	2	382	1
102	2	454	1
102	2	297	1
102	2	418	1
102	2	360	1
102	2	371	1
102	2	414	1
102	2	500	1
102	2	538	1
102	2	375	1
102	2	374	1
102	2	389	1
102	2	539	1
102	2	470	1

## Sheet: 103
Subject	Condition 1=congruent, 2=incongruent	Reaction time（ms）	1=correct, 0=wrong
103	1	473	1
103	1	385	1
103	1	239	1
103	1	197	1
103	1	620	1
103	1	371	1
103	1	425	1
103	1	399	1
103	1	419	1
103	1	423	1
103	1	145	1
103	1	393	1
103	1	369	1
103	1	398	1
103	1	398	1
103	1	409	1
103	1	411	1
103	1	173	1
103	1	427	1
103	1	365	1
103	1	440	1
103	1	373	1
103	1	366	1
103	1	472	1
103	1	322	1
103	1	431	1
103	1	428	1
103	1	325	1
103	1	456	1
103	1	397	1
103	1	409	1
103	1	389	1
103	1	197	1
103	1	430	1
103	1	394	1
103	1	377	1
103	1	420	1
103	1	385	1
103	1	173	1
103	1	408	1
103	1	405	1
103	1	407	1
103	1	184	1
103	1	386	1
103	1	460	1
103	1	285	1
103	1	388	1
103	1	222	1
103	1	676	1
103	1	433	1
103	1	556	1
103	1	410	1
103	1	426	1
103	1	455	1
103	1	476	1
103	1	410	1
103	1	333	1
103	1	342	1
103	1	379	1
103	1	375	1
103	1	448	1
103	1	563	1
103	1	409	1
103	1	398	1
103	1	311	1
103	1	378	1
103	1	429	1
103	1	443	1
103	1	423	1
103	1	407	1
103	1	479	1
103	1	344	1
103	1	417	1
103	1	394	1
103	1	364	1
103	1	613	1
103	1	378	1
103	1	377	1
103	1	163	1
103	1	748	1
103	2	262	0
103	2	191	0
103	2	637	1
103	2	459	1
103	2	483	1
103	2	395	1
103	2	362	1
103	2	427	1
103	2	399	1
103	2	407	1
103	2	427	1
103	2	379	1
103	2	389	1
103	2	443	1
103	2	386	1
103	2	366	1
103	2	502	1
103	2	394	1
103	2	395	1
103	2	459	1
103	2	396	1
103	2	527	1
103	2	447	1
103	2	433	1
103	2	423	1
103	2	440	1
103	2	593	1
103	2	418	1
103	2	521	1
103	2	431	1
103	2	449	1
103	2	434	1
103	2	394	1
103	2	392	1
103	2	394	1
103	2	392	1
103	2	588	1
103	2	406	1
103	2	411	1
103	2	534	1
103	2	440	1
103	2	592	1
103	2	387	1
103	2	578	1
103	2	433	1
103	2	446	1
103	2	421	1
103	2	412	1
103	2	407	1
103	2	397	1
103	2	569	1
103	2	405	1
103	2	463	1
103	2	421	1
103	2	414	1
103	2	375	1
103	2	364	1
103	2	418	1
103	2	364	1
103	2	377	1
103	2	441	1
103	2	441	1
103	2	436	1
103	2	378	1
103	2	370	1
103	2	508	1
103	2	417	1
103	2	396	1
103	2	445	1
103	2	480	1
103	2	488	1
103	2	386	1
103	2	421	1
103	2	342	1
103	2	413	1
103	2	399	1
103	2	380	1
103	2	376	1
103	2	464	1
103	2	354	1

## Sheet: 104
Subject	Condition 1=congruent, 2=incongruent	Reaction time（ms）	1=correct, 0=wrong
104	1	290	0
104	1	384	0
104	1	437	0
104	1	0	0
104	1	0	0
104	1	0	0
104	1	0	0
104	1	0	0
104	1	0	0
104	1	0	0
104	1	0	0
104	1	0	0
104	1	411	0
104	1	0	0
104	1	0	0
104	1	0	0
104	1	0	0
104	1	0	0
104	1	266	1
104	1	519	1
104	1	462	1
104	1	365	1
104	1	353	1
104	1	462	1
104	1	482	1
104	1	293	1
104	1	220	1
104	1	120	1
104	1	367	1
104	1	350	1
104	1	212	1
104	1	470	1
104	1	247	1
104	1	196	1
104	1	180	1
104	1	463	1
104	1	581	1
104	1	143	1
104	1	132	1
104	1	364	1
104	1	237	1
104	1	411	1
104	1	510	1
104	1	252	1
104	1	351	1
104	1	367	1
104	1	350	1
104	1	444	1
104	1	647	1
104	1	392	1
104	1	221	1
104	1	369	1
104	1	266	1
104	1	366	1
104	1	175	1
104	1	556	1
104	1	397	1
104	1	378	1
104	1	219	1
104	1	414	1
104	1	379	1
104	1	313	1
104	1	191	1
104	1	319	1
104	1	368	1
104	1	427	1
104	1	511	1
104	1	453	1
104	1	414	1
104	1	388	1
104	1	338	1
104	1	507	1
104	1	170	1
104	1	338	1
104	1	443	1
104	1	18	1
104	1	432	1
104	1	173	1
104	1	333	1
104	1	396	1
104	2	293	0
104	2	324	0
104	2	180	0
104	2	239	0
104	2	131	0
104	2	188	0
104	2	299	0
104	2	323	0
104	2	146	0
104	2	273	0
104	2	242	0
104	2	157	0
104	2	175	0
104	2	260	0
104	2	180	0
104	2	206	0
104	2	227	0
104	2	195	0
104	2	0	0
104	2	195	0
104	2	0	0
104	2	0	0
104	2	0	0
104	2	0	0
104	2	0	0
104	2	0	0
104	2	0	0
104	2	432	0
104	2	0	0
104	2	0	0
104	2	536	1
104	2	393	1
104	2	560	1
104	2	488	1
104	2	399	1
104	2	377	1
104	2	297	1
104	2	141	1
104	2	324	1
104	2	476	1
104	2	376	1
104	2	460	1
104	2	349	1
104	2	442	1
104	2	467	1
104	2	340	1
104	2	348	1
104	2	506	1
104	2	480	1
104	2	398	1
104	2	439	1
104	2	373	1
104	2	390	1
104	2	406	1
104	2	330	1
104	2	431	1
104	2	426	1
104	2	439	1
104	2	351	1
104	2	442	1
104	2	379	1
104	2	425	1
104	2	372	1
104	2	619	1
104	2	465	1
104	2	362	1
104	2	297	1
104	2	397	1
104	2	318	1
104	2	323	1
104	2	342	1
104	2	469	1
104	2	309	1
104	2	410	1
104	2	375	1
104	2	367	1
104	2	431	1
104	2	357	1
104	2	363	1
104	2	448	1

## Sheet: 105
Subject	Condition 1=congruent, 2=incongruent	Reaction time（ms）	1=correct, 0=wrong
105	1	328	0
105	1	428	1
105	1	357	1
105	1	355	1
105	1	383	1
105	1	359	1
105	1	397	1
105	1	347	1
105	1	367	1
105	1	338	1
105	1	419	1
105	1	339	1
105	1	361	1
105	1	305	1
105	1	356	1
105	1	278	1
105	1	327	1
105	1	335	1
105	1	311	1
105	1	324	1
105	1	357	1
105	1	379	1
105	1	332	1
105	1	165	1
105	1	395	1
105	1	357	1
105	1	382	1
105	1	376	1
105	1	385	1
105	1	373	1
105	1	341	1
105	1	372	1
105	1	328	1
105	1	310	1
105	1	329	1
105	1	368	1
105	1	282	1
105	1	344	1
105	1	391	1
105	1	340	1
105	1	337	1
105	1	412	1
105	1	392	1
105	1	339	1
105	1	344	1
105	1	337	1
105	1	334	1
105	1	332	1
105	1	376	1
105	1	343	1
105	1	445	1
105	1	352	1
105	1	438	1
105	1	283	1
105	1	383	1
105	1	405	1
105	1	413	1
105	1	373	1
105	1	375	1
105	1	326	1
105	1	210	1
105	1	256	1
105	1	290	1
105	1	313	1
105	1	349	1
105	1	341	1
105	1	202	1
105	1	341	1
105	1	305	1
105	1	362	1
105	1	325	1
105	1	308	1
105	1	293	1
105	1	226	1
105	1	296	1
105	1	370	1
105	1	316	1
105	1	230	1
105	1	305	1
105	1	313	1
105	2	185	0
105	2	154	0
105	2	131	0
105	2	146	0
105	2	165	0
105	2	375	1
105	2	401	1
105	2	323	1
105	2	296	1
105	2	338	1
105	2	352	1
105	2	301	1
105	2	301	1
105	2	343	1
105	2	339	1
105	2	318	1
105	2	386	1
105	2	326	1
105	2	321	1
105	2	319	1
105	2	339	1
105	2	320	1
105	2	368	1
105	2	341	1
105	2	367	1
105	2	391	1
105	2	362	1
105	2	382	1
105	2	366	1
105	2	354	1
105	2	344	1
105	2	347	1
105	2	330	1
105	2	313	1
105	2	347	1
105	2	373	1
105	2	375	1
105	2	362	1
105	2	367	1
105	2	388	1
105	2	356	1
105	2	316	1
105	2	362	1
105	2	344	1
105	2	339	1
105	2	354	1
105	2	380	1
105	2	329	1
105	2	337	1
105	2	339	1
105	2	346	1
105	2	417	1
105	2	303	1
105	2	337	1
105	2	357	1
105	2	346	1
105	2	356	1
105	2	289	1
105	2	320	1
105	2	342	1
105	2	389	1
105	2	351	1
105	2	372	1
105	2	355	1
105	2	343	1
105	2	354	1
105	2	342	1
105	2	316	1
105	2	341	1
105	2	336	1
105	2	365	1
105	2	348	1
105	2	326	1
105	2	321	1
105	2	321	1
105	2	274	1
105	2	449	1
105	2	308	1
105	2	273	1
105	2	287	1

## Sheet: 106
Subject	Condition 1=congruent, 2=incongruent	Reaction time（ms）	1=correct, 0=wrong
106	2	190	0
106	2	191	0
106	1	427	1
106	1	463	1
106	1	401	1
106	1	412	1
106	1	373	1
106	1	366	1
106	1	394	1
106	1	411	1
106	1	419	1
106	1	361	1
106	1	384	1
106	1	376	1
106	1	394	1
106	1	352	1
106	1	403	1
106	1	379	1
106	1	321	1
106	1	381	1
106	1	359	1
106	1	420	1
106	1	415	1
106	1	372	1
106	1	361	1
106	1	428	1
106	1	439	1
106	1	384	1
106	1	348	1
106	1	396	1
106	1	401	1
106	1	221	1
106	1	353	1
106	1	198	1
106	1	437	1
106	1	385	1
106	1	370	1
106	1	406	1
106	1	346	1
106	1	398	1
106	1	353	1
106	1	403	1
106	1	351	1
106	1	362	1
106	1	336	1
106	1	400	1
106	1	407	1
106	1	304	1
106	1	404	1
106	1	299	1
106	1	375	1
106	1	306	1
106	1	394	1
106	1	338	1
106	1	360	1
106	1	406	1
106	1	384	1
106	1	415	1
106	1	362	1
106	1	420	1
106	1	379	1
106	1	341	1
106	1	456	1
106	1	363	1
106	1	400	1
106	1	346	1
106	1	411	1
106	1	196	1
106	1	348	1
106	1	339	1
106	1	417	1
106	1	386	1
106	1	398	1
106	1	350	1
106	1	374	1
106	1	441	1
106	1	360	1
106	1	437	1
106	1	416	1
106	1	374	1
106	1	384	1
106	1	405	1
106	2	457	1
106	2	450	1
106	2	476	1
106	2	461	1
106	2	441	1
106	2	392	1
106	2	380	1
106	2	389	1
106	2	412	1
106	2	408	1
106	2	332	1
106	2	396	1
106	2	403	1
106	2	414	1
106	2	457	1
106	2	349	1
106	2	426	1
106	2	417	1
106	2	387	1
106	2	321	1
106	2	395	1
106	2	596	1
106	2	413	1
106	2	422	1
106	2	453	1
106	2	478	1
106	2	391	1
106	2	367	1
106	2	415	1
106	2	426	1
106	2	376	1
106	2	391	1
106	2	391	1
106	2	337	1
106	2	402	1
106	2	381	1
106	2	423	1
106	2	370	1
106	2	424	1
106	2	413	1
106	2	430	1
106	2	647	1
106	2	425	1
106	2	357	1
106	2	369	1
106	2	387	1
106	2	364	1
106	2	425	1
106	2	348	1
106	2	363	1
106	2	444	1
106	2	424	1
106	2	348	1
106	2	395	1
106	2	365	1
106	2	420	1
106	2	394	1
106	2	398	1
106	2	427	1
106	2	395	1
106	2	371	1
106	2	366	1
106	2	447	1
106	2	400	1
106	2	387	1
106	2	408	1
106	2	377	1
106	2	350	1
106	2	358	1
106	2	448	1
106	2	380	1
106	2	392	1
106	2	541	1
106	2	367	1
106	2	411	1
106	2	463	1
106	2	372	1
106	2	429	1

## Sheet: 107
Subject	Condition 1=congruent, 2=incongruent	Reaction time（ms）	1=correct, 0=wrong
107	1	455	0
107	1	450	0
107	1	399	1
107	1	397	1
107	1	372	1
107	1	412	1
107	1	401	1
107	1	407	1
107	1	395	1
107	1	375	1
107	1	411	1
107	1	351	1
107	1	402	1
107	1	334	1
107	1	343	1
107	1	384	1
107	1	344	1
107	1	364	1
107	1	411	1
107	1	353	1
107	1	423	1
107	1	393	1
107	1	380	1
107	1	347	1
107	1	355	1
107	1	376	1
107	1	399	1
107	1	385	1
107	1	439	1
107	1	135	1
107	1	377	1
107	1	344	1
107	1	336	1
107	1	346	1
107	1	385	1
107	1	386	1
107	1	343	1
107	1	362	1
107	1	394	1
107	1	400	1
107	1	335	1
107	1	379	1
107	1	400	1
107	1	339	1
107	1	348	1
107	1	339	1
107	1	276	1
107	1	365	1
107	1	356	1
107	1	361	1
107	1	365	1
107	1	340	1
107	1	335	1
107	1	350	1
107	1	163	1
107	1	351	1
107	1	373	1
107	1	310	1
107	1	323	1
107	1	358	1
107	1	386	1
107	1	337	1
107	1	429	1
107	1	379	1
107	1	417	1
107	1	378	1
107	1	346	1
107	1	359	1
107	1	361	1
107	1	319	1
107	1	354	1
107	1	348	1
107	1	380	1
107	1	369	1
107	1	351	1
107	1	390	1
107	1	439	1
107	1	379	1
107	1	339	1
107	1	356	1
107	2	176	0
107	2	205	0
107	2	134	0
107	2	407	1
107	2	374	1
107	2	372	1
107	2	358	1
107	2	378	1
107	2	350	1
107	2	335	1
107	2	338	1
107	2	358	1
107	2	361	1
107	2	337	1
107	2	330	1
107	2	363	1
107	2	351	1
107	2	332	1
107	2	390	1
107	2	375	1
107	2	358	1
107	2	333	1
107	2	351	1
107	2	405	1
107	2	304	1
107	2	337	1
107	2	342	1
107	2	348	1
107	2	337	1
107	2	365	1
107	2	426	1
107	2	377	1
107	2	412	1
107	2	390	1
107	2	390	1
107	2	391	1
107	2	368	1
107	2	330	1
107	2	356	1
107	2	329	1
107	2	332	1
107	2	341	1
107	2	392	1
107	2	415	1
107	2	385	1
107	2	356	1
107	2	380	1
107	2	322	1
107	2	424	1
107	2	441	1
107	2	354	1
107	2	345	1
107	2	342	1
107	2	347	1
107	2	373	1
107	2	368	1
107	2	316	1
107	2	334	1
107	2	286	1
107	2	355	1
107	2	407	1
107	2	376	1
107	2	337	1
107	2	384	1
107	2	434	1
107	2	395	1
107	2	317	1
107	2	292	1
107	2	393	1
107	2	396	1
107	2	358	1
107	2	340	1
107	2	318	1
107	2	333	1
107	2	345	1
107	2	331	1
107	2	381	1
107	2	353	1
107	2	301	1
107	2	358	1

## Sheet: 108
Subject	Condition 1=congruent, 2=incongruent	Reaction time（ms）	1=correct, 0=wrong
108	1	417	1
108	1	472	1
108	1	456	1
108	1	485	1
108	1	594	1
108	1	513	1
108	1	518	1
108	1	541	1
108	1	476	1
108	1	468	1
108	1	519	1
108	1	579	1
108	1	469	1
108	1	456	1
108	1	550	1
108	1	518	1
108	1	446	1
108	1	457	1
108	1	469	1
108	1	433	1
108	1	456	1
108	1	494	1
108	1	462	1
108	1	450	1
108	1	445	1
108	1	480	1
108	1	434	1
108	1	532	1
108	1	498	1
108	1	484	1
108	1	483	1
108	1	461	1
108	1	437	1
108	1	524	1
108	1	429	1
108	1	587	1
108	1	522	1
108	1	460	1
108	1	438	1
108	1	458	1
108	1	428	1
108	1	425	1
108	1	397	1
108	1	456	1
108	1	477	1
108	1	484	1
108	1	473	1
108	1	419	1
108	1	410	1
108	1	446	1
108	1	437	1
108	1	386	1
108	1	417	1
108	1	428	1
108	1	369	1
108	1	465	1
108	1	399	1
108	1	437	1
108	1	398	1
108	1	414	1
108	1	471	1
108	1	451	1
108	1	378	1
108	1	478	1
108	1	424	1
108	1	493	1
108	1	485	1
108	1	456	1
108	1	410	1
108	1	409	1
108	1	399	1
108	1	362	1
108	1	416	1
108	1	388	1
108	1	586	1
108	1	389	1
108	1	424	1
108	1	384	1
108	1	511	1
108	1	432	1
108	2	522	1
108	2	511	1
108	2	447	1
108	2	497	1
108	2	502	1
108	2	681	1
108	2	577	1
108	2	506	1
108	2	439	1
108	2	432	1
108	2	419	1
108	2	506	1
108	2	496	1
108	2	454	1
108	2	465	1
108	2	494	1
108	2	665	1
108	2	430	1
108	2	410	1
108	2	474	1
108	2	430	1
108	2	433	1
108	2	509	1
108	2	456	1
108	2	537	1
108	2	522	1
108	2	764	1
108	2	500	1
108	2	498	1
108	2	514	1
108	2	653	1
108	2	445	1
108	2	470	1
108	2	435	1
108	2	444	1
108	2	539	1
108	2	525	1
108	2	453	1
108	2	529	1
108	2	471	1
108	2	516	1
108	2	437	1
108	2	417	1
108	2	448	1
108	2	408	1
108	2	467	1
108	2	448	1
108	2	557	1
108	2	393	1
108	2	471	1
108	2	430	1
108	2	479	1
108	2	512	1
108	2	479	1
108	2	450	1
108	2	422	1
108	2	441	1
108	2	484	1
108	2	433	1
108	2	437	1
108	2	430	1
108	2	437	1
108	2	493	1
108	2	520	1
108	2	444	1
108	2	418	1
108	2	427	1
108	2	449	1
108	2	397	1
108	2	416	1
108	2	423	1
108	2	404	1
108	2	385	1
108	2	390	1
108	2	367	1
108	2	398	1
108	2	419	1
108	2	471	1
108	2	443	1
108	2	510	1

## Sheet: 109
Subject	Condition 1=congruent, 2=incongruent	Reaction time（ms）	1=correct, 0=wrong
109	1	568	0
109	1	541	1
109	1	474	1
109	1	481	1
109	1	453	1
109	1	497	1
109	1	440	1
109	1	445	1
109	1	466	1
109	1	423	1
109	1	435	1
109	1	428	1
109	1	471	1
109	1	421	1
109	1	432	1
109	1	473	1
109	1	413	1
109	1	461	1
109	1	507	1
109	1	429	1
109	1	454	1
109	1	414	1
109	1	351	1
109	1	431	1
109	1	472	1
109	1	451	1
109	1	458	1
109	1	405	1
109	1	457	1
109	1	494	1
109	1	513	1
109	1	443	1
109	1	169	1
109	1	468	1
109	1	426	1
109	1	528	1
109	1	609	1
109	1	435	1
109	1	483	1
109	1	420	1
109	1	436	1
109	1	460	1
109	1	402	1
109	1	474	1
109	1	514	1
109	1	527	1
109	1	445	1
109	1	401	1
109	1	502	1
109	1	548	1
109	1	469	1
109	1	480	1
109	1	454	1
109	1	425	1
109	1	485	1
109	1	489	1
109	1	472	1
109	1	565	1
109	1	472	1
109	1	541	1
109	1	640	1
109	1	482	1
109	1	244	1
109	1	402	1
109	1	417	1
109	1	486	1
109	1	405	1
109	1	432	1
109	1	481	1
109	1	404	1
109	1	426	1
109	1	548	1
109	1	395	1
109	1	535	1
109	1	335	1
109	1	198	1
109	1	312	1
109	1	413	1
109	1	463	1
109	1	391	1
109	2	171	0
109	2	173	0
109	2	145	0
109	2	135	0
109	2	217	0
109	2	426	1
109	2	487	1
109	2	509	1
109	2	432	1
109	2	436	1
109	2	435	1
109	2	444	1
109	2	471	1
109	2	395	1
109	2	423	1
109	2	431	1
109	2	435	1
109	2	559	1
109	2	414	1
109	2	475	1
109	2	404	1
109	2	408	1
109	2	471	1
109	2	499	1
109	2	472	1
109	2	419	1
109	2	435	1
109	2	398	1
109	2	467	1
109	2	397	1
109	2	376	1
109	2	534	1
109	2	551	1
109	2	453	1
109	2	414	1
109	2	481	1
109	2	443	1
109	2	425	1
109	2	397	1
109	2	532	1
109	2	473	1
109	2	485	1
109	2	464	1
109	2	546	1
109	2	486	1
109	2	502	1
109	2	464	1
109	2	455	1
109	2	506	1
109	2	489	1
109	2	415	1
109	2	547	1
109	2	455	1
109	2	438	1
109	2	444	1
109	2	448	1
109	2	433	1
109	2	424	1
109	2	402	1
109	2	741	1
109	2	396	1
109	2	449	1
109	2	406	1
109	2	428	1
109	2	380	1
109	2	506	1
109	2	414	1
109	2	449	1
109	2	415	1
109	2	445	1
109	2	446	1
109	2	413	1
109	2	391	1
109	2	401	1
109	2	485	1
109	2	457	1
109	2	475	1
109	2	438	1
109	2	447	1
109	2	454	1

[truncated: 33 more sheets: 110, 111, 112, 113, 114, 115, 116, 117, 118, 119, 120, 121, 122, 201, 202, 203, 204, 205, 206, 207 …]
