# Supplementary material for: Motor expertise modulates unconscious rather than conscious executive control
Source: PeerJ. 2019 Feb 5;7:e6387. doi: 10.7717/peerj.6387 (PMC6368002; doi:10.7717/peerj.6387)
Supplement: Supplemental Information 2 [file peerj-07-6387-s002.xlsx]

## Sheet: personal information
Subject	Group 1=novices, 2=table tennis athletes	Sex 1=female, 2=male	Age	training years	weakly training times
101	1	2	25
102	1	2	19
103	1	2	20
104	1	2	19
105	1	2	19
106	1	2	20
107	1	2	18
108	1	2	19
109	1	1	20
110	1	1	22
111	1	2	20
112	1	1	20
113	1	1	20
114	1	1	21
115	1	1	20
116	1	2	20
117	1	2	20
118	1	2	25
119	1	2	19
120	1	2	18
121	1	1	20
122	1	2	22
201	2	2	20	5	2
202	2	2	21	5	3
203	2	2	21	6	2
204	2	2	22	3	2
205	2	2	21	14	3
206	2	1	19	2	2
207	2	2	20	5	2
208	2	2	22	6	2
209	2	2	21	14	6
210	2	1	22	2	5
211	2	1	21	3	2
212	2	2	23	3	2
213	2	1	20	10	5
214	2	2	21	8	7
215	2	2	21	3	5
216	2	1	20	12	4
217	2	1	18	9	6.5
218	2	2	20	10	3
219	2	2	19	10	5
220	2	2	19	6	6

## Sheet: unconscious RT-ER
Subject	Group 1=novices, 2=table tennis athletes	Congruent(RT:ms)	Incongruent(RT:ms)	Congruent(ER：%)	Incongruent(ER：%)	unconscious response priming	d'
101	1	405.08	401	0	0	-4.08	-0.52
102	1	359.303	378.861	0	5	19.5585	0.35
103	1	388.614	386.154	7	1	-2.46044	-0.38
104	1	444.917	437.257	3	7	-7.65952	0.56
105	1	366.638	359.27	5	4	-7.36741	0.11
106	1	398.2	393.147	3	4	-5.05333	-0.34
107	1	360.227	365.137	4	6	4.91032	0
108	1	403.108	424.455	1	0	21.3464	0
109	1	393.534	403.81	25	25	10.2759	-0.9
110	1	412.707	400.319	1	7	-12.3872	-0.53
111	1	372.68	379.779	0	0	7.09922	0.76
112	1	400.122	402.243	3	6	2.12162	0.75
113	1	444.579	439.603	1	0	-4.97621	-0.56
114	1	399.649	385.039	0	3	-14.6099	-0.43
115	1	446.573	457.421	0	3	10.8477	-0.53
116	1	382	385.93	1	4	3.92958	0.19
117	1	394.506	405.274	0	1	10.7676	0.36
118	1	422.107	412.538	3	0	-9.56821	-0.6
119	1	389.261	382.714	11	6	-6.54658	-0.78
120	1	395.842	398.744	1	0	2.90148	-0.43
121	1	430.986	421.74	1	0	-9.24623	0
122	1	448.479	449.013	3	0	0.533535	-0.31
201	2	362.763	392.941	0	9	30.178	-0.93
202	2	301.889	338.891	5	14	37.0017	-0.88
203	2	397.853	415.548	4	3	17.6946	-0.5
204	2	388.648	376.427	4	3	-12.2212	-0.52
205	2	405.44	426.156	1	0	20.7158	-1.1
206	2	397.364	410.237	0	1	12.8732	0.56
207	2	366.442	376.123	0	3	9.68173	0
208	2	356.923	369.11	0	5	12.1865	-0.56
209	2	309	381.509	0	25	72.5088	0.08
210	2	413.986	388.809	5	11	-25.1775	0.45
211	2	458.654	452.145	0	3	-6.50911	0.43
212	2	345.685	350.676	3	4	4.99074	-0.08
213	2	385.347	372.961	4	1	-12.3856	-0.61
214	2	360	378.539	1	0	18.5395	0.23
215	2	362.792	375.658	4	0	12.8662	0.81
216	2	333.423	364.922	1	14	31.4988	1.75
217	2	435.797	489.944	1	6	54.1464	-0.75
218	2	366.329	382.792	1	5	16.4627	0.81
219	2	372.442	391.481	0	0	19.039	0.48
220	2	381.836	403.829	4	7	21.993	-0.46

## Sheet: 101
Subject	Condition 1=congruent, 2=incongruent	Reaction time（ms）	1=correct, 0=wrong
101	1	338	1
101	1	347	1
101	1	351	1
101	1	357	1
101	1	357	1
101	1	363	1
101	1	369	1
101	1	372	1
101	1	373	1
101	1	373	1
101	1	376	1
101	1	377	1
101	1	377	1
101	1	378	1
101	1	378	1
101	1	378	1
101	1	379	1
101	1	380	1
101	1	380	1
101	1	382	1
101	1	384	1
101	1	386	1
101	1	386	1
101	1	390	1
101	1	391	1
101	1	391	1
101	1	392	1
101	1	392	1
101	1	393	1
101	1	393	1
101	1	395	1
101	1	395	1
101	1	396	1
101	1	396	1
101	1	396	1
101	1	397	1
101	1	397	1
101	1	399	1
101	1	401	1
101	1	403	1
101	1	403	1
101	1	404	1
101	1	404	1
101	1	408	1
101	1	408	1
101	1	410	1
101	1	412	1
101	1	414	1
101	1	414	1
101	1	416	1
101	1	417	1
101	1	417	1
101	1	417	1
101	1	419	1
101	1	420	1
101	1	422	1
101	1	424	1
101	1	425	1
101	1	426	1
101	1	428	1
101	1	433	1
101	1	435	1
101	1	435	1
101	1	438	1
101	1	438	1
101	1	440	1
101	1	446	1
101	1	448	1
101	1	449	1
101	1	450	1
101	1	451	1
101	1	452	1
101	1	457	1
101	1	459	1
101	1	461	1
101	1	461	1
101	1	480	1
101	1	482	1
101	1	485	1
101	1	493	1
101	2	362	1
101	2	363	1
101	2	366	1
101	2	367	1
101	2	367	1
101	2	367	1
101	2	368	1
101	2	371	1
101	2	372	1
101	2	375	1
101	2	375	1
101	2	375	1
101	2	377	1
101	2	377	1
101	2	377	1
101	2	378	1
101	2	378	1
101	2	379	1
101	2	383	1
101	2	384	1
101	2	384	1
101	2	385	1
101	2	386	1
101	2	387	1
101	2	388	1
101	2	389	1
101	2	392	1
101	2	394	1
101	2	394	1
101	2	396	1
101	2	396	1
101	2	396	1
101	2	398	1
101	2	399	1
101	2	400	1
101	2	401	1
101	2	402	1
101	2	404	1
101	2	405	1
101	2	405	1
101	2	406	1
101	2	406	1
101	2	407	1
101	2	409	1
101	2	409	1
101	2	410	1
101	2	410	1
101	2	411	1
101	2	411	1
101	2	412	1
101	2	413	1
101	2	413	1
101	2	414	1
101	2	414	1
101	2	415	1
101	2	417	1
101	2	417	1
101	2	418	1
101	2	419	1
101	2	419	1
101	2	419	1
101	2	420	1
101	2	420	1
101	2	422	1
101	2	422	1
101	2	423	1
101	2	423	1
101	2	423	1
101	2	427	1
101	2	428	1
101	2	429	1
101	2	432	1
101	2	434	1
101	2	445	1
101	2	446	1
101	2	451	1
101	2	460	1
101	2	470	1
101	2	471	1
101	2	474	1

## Sheet: 102
Subject	Condition 1=congruent, 2=incongruent	Reaction time（ms）	1=correct, 0=wrong
102	1	358	1
102	1	323	1
102	1	353	1
102	1	354	1
102	1	353	1
102	1	299	1
102	1	495	1
102	1	318	1
102	1	407	1
102	1	398	1
102	1	394	1
102	1	314	1
102	1	386	1
102	1	323	1
102	1	324	1
102	1	379	1
102	1	360	1
102	1	397	1
102	1	465	1
102	1	468	1
102	1	397	1
102	1	358	1
102	1	356	1
102	1	315	1
102	1	232	1
102	1	327	1
102	1	453	1
102	1	445	1
102	1	571	1
102	1	357	1
102	1	350	1
102	1	425	1
102	1	382	1
102	1	408	1
102	1	401	1
102	1	390	1
102	1	368	1
102	1	362	1
102	1	341	1
102	1	402	1
102	1	341	1
102	1	358	1
102	1	324	1
102	1	251	1
102	1	264	1
102	1	411	1
102	1	388	1
102	1	333	1
102	1	339	1
102	1	344	1
102	1	376	1
102	1	413	1
102	1	314	1
102	1	389	1
102	1	322	1
102	1	349	1
102	1	333	1
102	1	330	1
102	1	264	1
102	1	351	1
102	1	353	1
102	1	517	1
102	1	318	1
102	1	431	1
102	1	330	1
102	1	456	1
102	1	364	1
102	1	444	1
102	1	263	1
102	1	303	1
102	1	333	1
102	1	342	1
102	1	334	1
102	1	410	1
102	1	311	1
102	1	282	1
102	1	352	1
102	1	305	1
102	1	346	1
102	1	426	1
102	2	324	0
102	2	327	0
102	2	236	0
102	2	243	0
102	2	376	1
102	2	403	1
102	2	419	1
102	2	428	1
102	2	440	1
102	2	404	1
102	2	476	1
102	2	350	1
102	2	336	1
102	2	419	1
102	2	354	1
102	2	392	1
102	2	341	1
102	2	481	1
102	2	387	1
102	2	416	1
102	2	402	1
102	2	435	1
102	2	432	1
102	2	412	1
102	2	394	1
102	2	378	1
102	2	345	1
102	2	379	1
102	2	370	1
102	2	456	1
102	2	448	1
102	2	390	1
102	2	436	1
102	2	377	1
102	2	375	1
102	2	405	1
102	2	386	1
102	2	378	1
102	2	367	1
102	2	348	1
102	2	434	1
102	2	377	1
102	2	422	1
102	2	303	1
102	2	401	1
102	2	399	1
102	2	362	1
102	2	397	1
102	2	360	1
102	2	364	1
102	2	349	1
102	2	320	1
102	2	312	1
102	2	374	1
102	2	345	1
102	2	316	1
102	2	285	1
102	2	381	1
102	2	398	1
102	2	343	1
102	2	320	1
102	2	411	1
102	2	428	1
102	2	363	1
102	2	379	1
102	2	296	1
102	2	377	1
102	2	388	1
102	2	389	1
102	2	366	1
102	2	397	1
102	2	343	1
102	2	337	1
102	2	323	1
102	2	379	1
102	2	352	1
102	2	305	1
102	2	381	1
102	2	367	1
102	2	338	1

## Sheet: 103
Subject	Condition 1=congruent, 2=incongruent	Reaction time（ms）	1=correct, 0=wrong
103	1	404	0
103	1	364	0
103	1	389	0
103	1	0	0
103	1	403	0
103	1	390	0
103	1	344	1
103	1	336	1
103	1	329	1
103	1	355	1
103	1	428	1
103	1	420	1
103	1	441	1
103	1	403	1
103	1	394	1
103	1	395	1
103	1	405	1
103	1	436	1
103	1	397	1
103	1	419	1
103	1	573	1
103	1	388	1
103	1	405	1
103	1	455	1
103	1	377	1
103	1	369	1
103	1	430	1
103	1	420	1
103	1	420	1
103	1	438	1
103	1	332	1
103	1	355	1
103	1	436	1
103	1	405	1
103	1	435	1
103	1	281	1
103	1	338	1
103	1	378	1
103	1	455	1
103	1	394	1
103	1	391	1
103	1	333	1
103	1	354	1
103	1	379	1
103	1	245	1
103	1	398	1
103	1	419	1
103	1	399	1
103	1	329	1
103	1	394	1
103	1	366	1
103	1	369	1
103	1	381	1
103	1	403	1
103	1	400	1
103	1	428	1
103	1	374	1
103	1	420	1
103	1	382	1
103	1	404	1
103	1	344	1
103	1	454	1
103	1	396	1
103	1	300	1
103	1	295	1
103	1	507	1
103	1	436	1
103	1	416	1
103	1	287	1
103	1	344	1
103	1	375	1
103	1	433	1
103	1	406	1
103	1	397	1
103	1	320	1
103	1	463	1
103	1	479	1
103	1	378	1
103	1	344	1
103	1	263	1
103	2	355	0
103	2	328	1
103	2	340	1
103	2	337	1
103	2	352	1
103	2	328	1
103	2	369	1
103	2	397	1
103	2	365	1
103	2	425	1
103	2	385	1
103	2	390	1
103	2	382	1
103	2	354	1
103	2	368	1
103	2	394	1
103	2	377	1
103	2	421	1
103	2	384	1
103	2	456	1
103	2	408	1
103	2	440	1
103	2	409	1
103	2	372	1
103	2	351	1
103	2	435	1
103	2	369	1
103	2	364	1
103	2	422	1
103	2	398	1
103	2	417	1
103	2	385	1
103	2	374	1
103	2	336	1
103	2	406	1
103	2	350	1
103	2	410	1
103	2	346	1
103	2	387	1
103	2	394	1
103	2	420	1
103	2	448	1
103	2	382	1
103	2	352	1
103	2	399	1
103	2	376	1
103	2	442	1
103	2	371	1
103	2	460	1
103	2	386	1
103	2	386	1
103	2	541	1
103	2	442	1
103	2	388	1
103	2	459	1
103	2	343	1
103	2	391	1
103	2	379	1
103	2	364	1
103	2	382	1
103	2	389	1
103	2	331	1
103	2	411	1
103	2	377	1
103	2	365	1
103	2	408	1
103	2	380	1
103	2	382	1
103	2	423	1
103	2	378	1
103	2	401	1
103	2	365	1
103	2	400	1
103	2	391	1
103	2	332	1
103	2	368	1
103	2	376	1
103	2	401	1
103	2	356	1
103	2	391	1

## Sheet: 104
Subject	Condition 1=congruent, 2=incongruent	Reaction time（ms）	1=correct, 0=wrong
104	1	366	0
104	1	410	0
104	1	473	1
104	1	490	1
104	1	580	1
104	1	519	1
104	1	450	1
104	1	687	1
104	1	619	1
104	1	451	1
104	1	374	1
104	1	461	1
104	1	513	1
104	1	448	1
104	1	566	1
104	1	443	1
104	1	566	1
104	1	420	1
104	1	444	1
104	1	567	1
104	1	428	1
104	1	525	1
104	1	442	1
104	1	417	1
104	1	431	1
104	1	460	1
104	1	396	1
104	1	318	1
104	1	392	1
104	1	437	1
104	1	417	1
104	1	412	1
104	1	375	1
104	1	518	1
104	1	562	1
104	1	430	1
104	1	432	1
104	1	473	1
104	1	416	1
104	1	368	1
104	1	444	1
104	1	378	1
104	1	443	1
104	1	357	1
104	1	365	1
104	1	478	1
104	1	369	1
104	1	375	1
104	1	401	1
104	1	402	1
104	1	373	1
104	1	234	1
104	1	438	1
104	1	203	1
104	1	390	1
104	1	400	1
104	1	473	1
104	1	637	1
104	1	644	1
104	1	535	1
104	1	155	1
104	1	482	1
104	1	250	1
104	1	648	1
104	1	490	1
104	1	542	1
104	1	394	1
104	1	338	1
104	1	418	1
104	1	410	1
104	1	396	1
104	1	347	1
104	1	461	1
104	1	407	1
104	1	366	1
104	1	597	1
104	1	562	1
104	1	384	1
104	1	538	1
104	1	361	1
104	2	447	0
104	2	225	0
104	2	331	0
104	2	602	0
104	2	295	0
104	2	374	0
104	2	547	1
104	2	487	1
104	2	515	1
104	2	634	1
104	2	523	1
104	2	519	1
104	2	522	1
104	2	532	1
104	2	451	1
104	2	445	1
104	2	460	1
104	2	475	1
104	2	465	1
104	2	415	1
104	2	369	1
104	2	380	1
104	2	539	1
104	2	454	1
104	2	408	1
104	2	404	1
104	2	438	1
104	2	384	1
104	2	430	1
104	2	396	1
104	2	493	1
104	2	415	1
104	2	476	1
104	2	428	1
104	2	395	1
104	2	428	1
104	2	413	1
104	2	473	1
104	2	367	1
104	2	441	1
104	2	428	1
104	2	450	1
104	2	454	1
104	2	633	1
104	2	428	1
104	2	363	1
104	2	441	1
104	2	413	1
104	2	553	1
104	2	490	1
104	2	350	1
104	2	441	1
104	2	398	1
104	2	372	1
104	2	309	1
104	2	527	1
104	2	381	1
104	2	456	1
104	2	432	1
104	2	463	1
104	2	447	1
104	2	419	1
104	2	413	1
104	2	432	1
104	2	358	1
104	2	416	1
104	2	460	1
104	2	440	1
104	2	377	1
104	2	357	1
104	2	543	1
104	2	375	1
104	2	436	1
104	2	392	1
104	2	414	1
104	2	388	1
104	2	588	1
104	2	423	1
104	2	395	1
104	2	396	1

## Sheet: 105
Subject	Condition 1=congruent, 2=incongruent	Reaction time（ms）	1=correct, 0=wrong
105	1	364	0
105	1	332	0
105	1	373	0
105	1	410	0
105	1	333	1
105	1	320	1
105	1	363	1
105	1	402	1
105	1	326	1
105	1	531	1
105	1	355	1
105	1	419	1
105	1	362	1
105	1	368	1
105	1	423	1
105	1	370	1
105	1	425	1
105	1	386	1
105	1	386	1
105	1	353	1
105	1	364	1
105	1	358	1
105	1	327	1
105	1	356	1
105	1	314	1
105	1	329	1
105	1	296	1
105	1	384	1
105	1	356	1
105	1	406	1
105	1	403	1
105	1	343	1
105	1	366	1
105	1	380	1
105	1	333	1
105	1	413	1
105	1	338	1
105	1	397	1
105	1	396	1
105	1	372	1
105	1	366	1
105	1	341	1
105	1	369	1
105	1	319	1
105	1	337	1
105	1	219	1
105	1	352	1
105	1	385	1
105	1	383	1
105	1	539	1
105	1	376	1
105	1	333	1
105	1	393	1
105	1	246	1
105	1	434	1
105	1	347	1
105	1	324	1
105	1	257	1
105	1	316	1
105	1	298	1
105	1	345	1
105	1	346	1
105	1	380	1
105	1	433	1
105	1	406	1
105	1	358	1
105	1	538	1
105	1	336	1
105	1	354	1
105	1	414	1
105	1	507	1
105	1	509	1
105	1	463	1
105	1	361	1
105	1	432	1
105	1	335	1
105	1	380	1
105	1	383	1
105	1	404	1
105	1	416	1
105	2	340	0
105	2	358	0
105	2	260	0
105	2	372	1
105	2	369	1
105	2	362	1
105	2	380	1
105	2	364	1
105	2	346	1
105	2	340	1
105	2	346	1
105	2	351	1
105	2	322	1
105	2	376	1
105	2	385	1
105	2	400	1
105	2	361	1
105	2	366	1
105	2	351	1
105	2	321	1
105	2	396	1
105	2	326	1
105	2	373	1
105	2	330	1
105	2	412	1
105	2	353	1
105	2	372	1
105	2	345	1
105	2	344	1
105	2	338	1
105	2	337	1
105	2	366	1
105	2	365	1
105	2	404	1
105	2	384	1
105	2	402	1
105	2	385	1
105	2	331	1
105	2	377	1
105	2	371	1
105	2	360	1
105	2	412	1
105	2	334	1
105	2	329	1
105	2	413	1
105	2	387	1
105	2	351	1
105	2	350	1
105	2	371	1
105	2	315	1
105	2	331	1
105	2	354	1
105	2	333	1
105	2	359	1
105	2	308	1
105	2	322	1
105	2	394	1
105	2	344	1
105	2	381	1
105	2	360	1
105	2	322	1
105	2	378	1
105	2	361	1
105	2	321	1
105	2	361	1
105	2	368	1
105	2	362	1
105	2	341	1
105	2	308	1
105	2	364	1
105	2	354	1
105	2	389	1
105	2	362	1
105	2	377	1
105	2	379	1
105	2	334	1
105	2	445	1
105	2	374	1
105	2	421	1
105	2	441	1

## Sheet: 106
Subject	Condition 1=congruent, 2=incongruent	Reaction time（ms）	1=correct, 0=wrong
106	1	366	0
106	1	328	0
106	1	383	1
106	1	491	1
106	1	390	1
106	1	435	1
106	1	371	1
106	1	382	1
106	1	379	1
106	1	460	1
106	1	513	1
106	1	450	1
106	1	464	1
106	1	423	1
106	1	426	1
106	1	445	1
106	1	453	1
106	1	432	1
106	1	484	1
106	1	311	1
106	1	438	1
106	1	423	1
106	1	519	1
106	1	323	1
106	1	464	1
106	1	634	1
106	1	449	1
106	1	380	1
106	1	322	1
106	1	326	1
106	1	333	1
106	1	311	1
106	1	438	1
106	1	449	1
106	1	473	1
106	1	276	1
106	1	420	1
106	1	394	1
106	1	342	1
106	1	281	1
106	1	356	1
106	1	325	1
106	1	422	1
106	1	395	1
106	1	426	1
106	1	369	1
106	1	468	1
106	1	370	1
106	1	328	1
106	1	385	1
106	1	417	1
106	1	326	1
106	1	447	1
106	1	432	1
106	1	410	1
106	1	458	1
106	1	384	1
106	1	507	1
106	1	389	1
106	1	408	1
106	1	351	1
106	1	339	1
106	1	391	1
106	1	359	1
106	1	642	1
106	1	288	1
106	1	553	1
106	1	392	1
106	1	371	1
106	1	371	1
106	1	337	1
106	1	356	1
106	1	370	1
106	1	473	1
106	1	448	1
106	1	384	1
106	1	390	1
106	1	422	1
106	1	426	1
106	1	322	1
106	2	315	0
106	2	233	0
106	2	339	0
106	2	388	1
106	2	384	1
106	2	383	1
106	2	434	1
106	2	431	1
106	2	384	1
106	2	397	1
106	2	339	1
106	2	408	1
106	2	459	1
106	2	427	1
106	2	444	1
106	2	381	1
106	2	429	1
106	2	343	1
106	2	459	1
106	2	346	1
106	2	535	1
106	2	485	1
106	2	428	1
106	2	472	1
106	2	407	1
106	2	448	1
106	2	361	1
106	2	374	1
106	2	365	1
106	2	354	1
106	2	494	1
106	2	324	1
106	2	423	1
106	2	319	1
106	2	356	1
106	2	294	1
106	2	387	1
106	2	358	1
106	2	377	1
106	2	428	1
106	2	345	1
106	2	433	1
106	2	378	1
106	2	361	1
106	2	341	1
106	2	435	1
106	2	328	1
106	2	405	1
106	2	445	1
106	2	645	1
106	2	502	1
106	2	395	1
106	2	389	1
106	2	419	1
106	2	377	1
106	2	417	1
106	2	373	1
106	2	441	1
106	2	400	1
106	2	432	1
106	2	369	1
106	2	326	1
106	2	418	1
106	2	406	1
106	2	356	1
106	2	349	1
106	2	377	1
106	2	436	1
106	2	355	1
106	2	500	1
106	2	325	1
106	2	361	1
106	2	392	1
106	2	359	1
106	2	387	1
106	2	352	1
106	2	378	1
106	2	290	1
106	2	437	1
106	2	407	1

## Sheet: 107
Subject	Condition 1=congruent, 2=incongruent	Reaction time（ms）	1=correct, 0=wrong
107	1	321	0
107	1	375	0
107	1	372	0
107	1	343	1
107	1	311	1
107	1	352	1
107	1	338	1
107	1	345	1
107	1	374	1
107	1	328	1
107	1	353	1
107	1	402	1
107	1	365	1
107	1	369	1
107	1	391	1
107	1	367	1
107	1	425	1
107	1	334	1
107	1	312	1
107	1	328	1
107	1	339	1
107	1	282	1
107	1	436	1
107	1	290	1
107	1	475	1
107	1	356	1
107	1	346	1
107	1	328	1
107	1	463	1
107	1	377	1
107	1	364	1
107	1	340	1
107	1	451	1
107	1	424	1
107	1	375	1
107	1	350	1
107	1	388	1
107	1	356	1
107	1	409	1
107	1	393	1
107	1	420	1
107	1	423	1
107	1	413	1
107	1	416	1
107	1	335	1
107	1	253	1
107	1	366	1
107	1	340	1
107	1	313	1
107	1	315	1
107	1	335	1
107	1	452	1
107	1	268	1
107	1	309	1
107	1	282	1
107	1	257	1
107	1	283	1
107	1	320	1
107	1	447	1
107	1	275	1
107	1	405	1
107	1	294	1
107	1	326	1
107	1	343	1
107	1	357	1
107	1	370	1
107	1	499	1
107	1	374	1
107	1	405	1
107	1	305	1
107	1	441	1
107	1	292	1
107	1	341	1
107	1	473	1
107	1	462	1
107	1	367	1
107	1	382	1
107	1	386	1
107	1	382	1
107	1	386	1
107	2	269	0
107	2	334	0
107	2	368	0
107	2	291	0
107	2	216	0
107	2	316	1
107	2	317	1
107	2	308	1
107	2	367	1
107	2	356	1
107	2	416	1
107	2	373	1
107	2	372	1
107	2	342	1
107	2	346	1
107	2	354	1
107	2	367	1
107	2	387	1
107	2	352	1
107	2	300	1
107	2	350	1
107	2	313	1
107	2	400	1
107	2	383	1
107	2	309	1
107	2	405	1
107	2	429	1
107	2	359	1
107	2	362	1
107	2	360	1
107	2	382	1
107	2	315	1
107	2	341	1
107	2	354	1
107	2	362	1
107	2	400	1
107	2	374	1
107	2	410	1
107	2	394	1
107	2	347	1
107	2	426	1
107	2	423	1
107	2	339	1
107	2	400	1
107	2	296	1
107	2	360	1
107	2	366	1
107	2	284	1
107	2	415	1
107	2	365	1
107	2	343	1
107	2	344	1
107	2	321	1
107	2	356	1
107	2	352	1
107	2	420	1
107	2	354	1
107	2	371	1
107	2	394	1
107	2	355	1
107	2	335	1
107	2	336	1
107	2	415	1
107	2	417	1
107	2	367	1
107	2	357	1
107	2	353	1
107	2	367	1
107	2	330	1
107	2	372	1
107	2	375	1
107	2	369	1
107	2	375	1
107	2	496	1
107	2	382	1
107	2	390	1
107	2	360	1
107	2	357	1
107	2	358	1
107	2	418	1

## Sheet: 108
Subject	Condition 1=congruent, 2=incongruent	Reaction time（ms）	1=correct, 0=wrong
108	1	418	0
108	1	420	1
108	1	332	1
108	1	431	1
108	1	432	1
108	1	368	1
108	1	398	1
108	1	422	1
108	1	453	1
108	1	394	1
108	1	404	1
108	1	400	1
108	1	483	1
108	1	463	1
108	1	465	1
108	1	432	1
108	1	506	1
108	1	407	1
108	1	396	1
108	1	491	1
108	1	420	1
108	1	549	1
108	1	542	1
108	1	604	1
108	1	398	1
108	1	324	1
108	1	463	1
108	1	333	1
108	1	381	1
108	1	372	1
108	1	399	1
108	1	399	1
108	1	396	1
108	1	420	1
108	1	418	1
108	1	383	1
108	1	427	1
108	1	368	1
108	1	389	1
108	1	506	1
108	1	391	1
108	1	422	1
108	1	394	1
108	1	408	1
108	1	560	1
108	1	468	1
108	1	418	1
108	1	365	1
108	1	378	1
108	1	391	1
108	1	385	1
108	1	395	1
108	1	447	1
108	1	407	1
108	1	304	1
108	1	310	1
108	1	350	1
108	1	434	1
108	1	522	1
108	1	350	1
108	1	360	1
108	1	432	1
108	1	440	1
108	1	378	1
108	1	332	1
108	1	383	1
108	1	332	1
108	1	287	1
108	1	388	1
108	1	391	1
108	1	427	1
108	1	481	1
108	1	359	1
108	1	309	1
108	1	360	1
108	1	370	1
108	1	326	1
108	1	458	1
108	1	427	1
108	1	445	1
108	2	447	1
108	2	455	1
108	2	413	1
108	2	416	1
108	2	481	1
108	2	478	1
108	2	431	1
108	2	417	1
108	2	433	1
108	2	416	1
108	2	430	1
108	2	451	1
108	2	497	1
108	2	437	1
108	2	496	1
108	2	435	1
108	2	520	1
108	2	439	1
108	2	423	1
108	2	421	1
108	2	471	1
108	2	479	1
108	2	426	1
108	2	433	1
108	2	381	1
108	2	393	1
108	2	430	1
108	2	448	1
108	2	475	1
108	2	408	1
108	2	446	1
108	2	355	1
108	2	370	1
108	2	387	1
108	2	465	1
108	2	450	1
108	2	469	1
108	2	487	1
108	2	440	1
108	2	566	1
108	2	396	1
108	2	409	1
108	2	407	1
108	2	388	1
108	2	396	1
108	2	393	1
108	2	385	1
108	2	429	1
108	2	619	1
108	2	427	1
108	2	383	1
108	2	405	1
108	2	395	1
108	2	414	1
108	2	391	1
108	2	402	1
108	2	409	1
108	2	461	1
108	2	490	1
108	2	438	1
108	2	445	1
108	2	396	1
108	2	608	1
108	2	358	1
108	2	377	1
108	2	435	1
108	2	432	1
108	2	395	1
108	2	399	1
108	2	457	1
108	2	386	1
108	2	383	1
108	2	419	1
108	2	378	1
108	2	386	1
108	2	400	1
108	2	431	1
108	2	393	1
108	2	400	1
108	2	446	1

[truncated: 34 more sheets: 109, 110, 111, 112, 113, 114, 115, 116, 117, 118, 119, 120, 121, 122, 201, 202, 203, 204, 205, 206 …]
